# Supplementary material for: Characteristics and correlations of leaf stomata in different Aleurites montana provenances
Source: PubMed Central journal article supplement (PMC6298671; doi:10.1371/journal.pone.0208899), 2018-12-18
Supplement: pone.0208899.s003.pdf [file pone.0208899.s003.pdf]

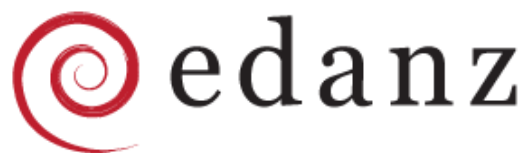

## Certificate of English Editing

**Date of Issue** 13 August 2018

### *About the manuscript:*

|                        |                                                                                                    |
|------------------------|----------------------------------------------------------------------------------------------------|
| <b>Title</b>           | Characteristics and correlations of leaf stomata in different <i>Aleurites montana</i> provenances |
| <b>First Author</b>    | Hong Tao                                                                                           |
| <b>Affiliation</b>     | Fujian Agriculture and Forestry University                                                         |
| <b>Date of editing</b> | 17 April 2018                                                                                      |

### *About the editor:*

|               |                                                                                                                                                                                                                                                         |
|---------------|---------------------------------------------------------------------------------------------------------------------------------------------------------------------------------------------------------------------------------------------------------|
| <b>Editor</b> | <p><b>Emma Tacken</b><br/>2013 - PhD Biology - University of Auckland<br/><i>Plant Molecular Biologist focused on characterizing regulatory and developmental pathways in model and non-model plant species</i></p> <p><a href="#">Full profile</a></p> |
|---------------|---------------------------------------------------------------------------------------------------------------------------------------------------------------------------------------------------------------------------------------------------------|

|                              |                                  |
|------------------------------|----------------------------------|
| <b>Certificate issued by</b> | Benjamin Shaw<br>Director        |
|                              | Liwen Bianji (Edanz Group China) |

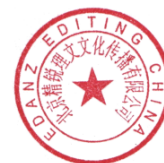

While this certificate confirms the authors have used Edanz's editing services, we cannot guarantee that additional changes have not been made after our edits. It is the author's responsibility to ensure any unclear sentences in the manuscript are clarified for the Edanz editor.

Liwen Bianji (Edanz Group China)  
Interchina Commercial Building, 1112A  
No 33. Dengshikou Street, Dongcheng District, Beijing, P.C. 100006, China  
Phone +86-10-6528-0877 Fax +86-10-6528-0834 Email [editing@liwenbianji.cn](mailto:editing@liwenbianji.cn)
